# Supplementary material
Source: PubMed Central journal article supplement (PMC3230536)
Supplement: epi0604_0416SD1.pdf [file epi0604_0416SD1.pdf]

# *Fnu4HI*

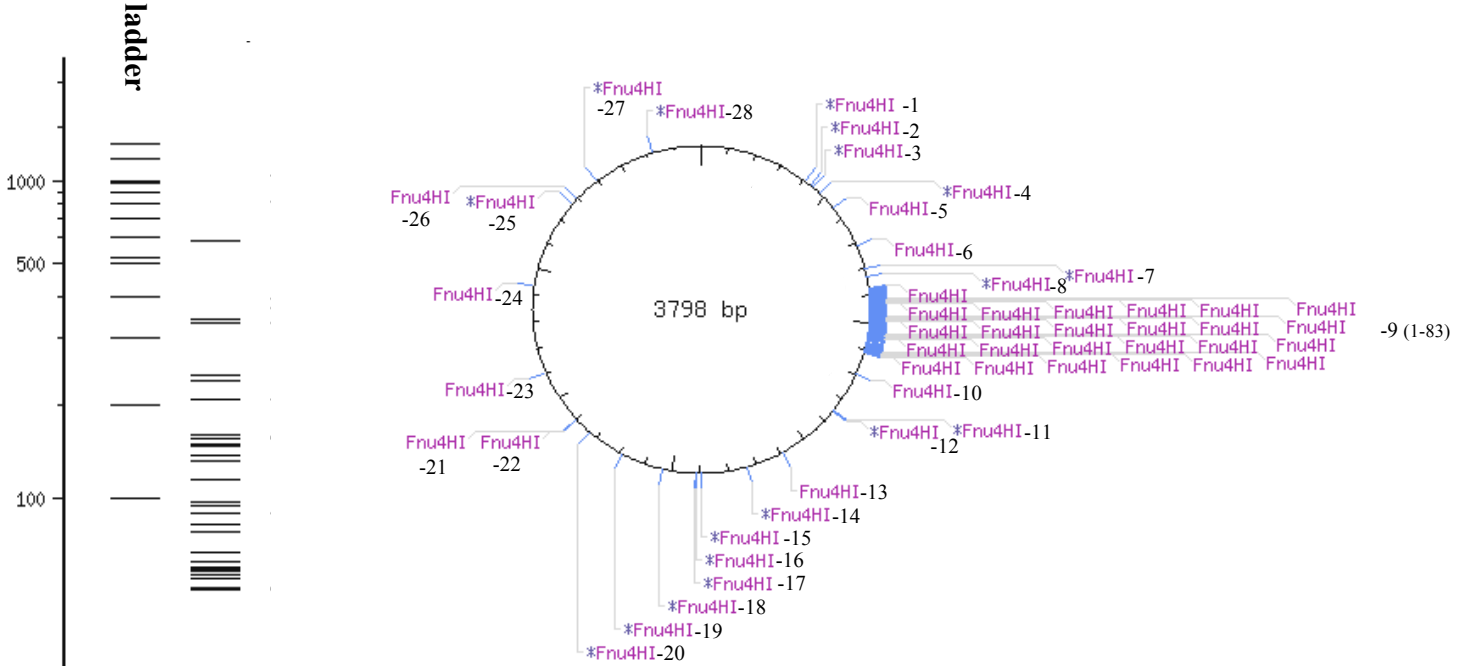

| #              | Cut position<br>(5' ext. -<br>3' ext.) | <i>Fnu</i> 4HI site with flanks |                                                                                   |
|----------------|----------------------------------------|---------------------------------|-----------------------------------------------------------------------------------|
|                |                                        | 5' -GC N GC-3'                  | 3' -CG N CG-5'                                                                    |
| 1              | *407/408                               | 5'-TAG <b>CGG</b> TCAC          | <b>GC T GC</b> GCGTAACCAC-3'                                                      |
| 2              | *429/430                               | 5'-CACCACACCC                   | <b>GC C GC</b> GCTTAATGCG-3'                                                      |
| 3              | *443/444                               | 5'-CG <b>CTT</b> AATGC          | <b>GC C GC</b> TACAGGGCGC-3'                                                      |
| 4              | *476/477                               | 5'-CG <b>CC</b> ATTTCAG         | <b>GC T GC</b> GCAACTGTTG-3'                                                      |
| 5              | 549/550                                | 5'-AGGGGGATGT                   | <b>GC T GC</b> AAGGCGATTA -3'                                                     |
| 6              | 710/711                                | 5'-TCGAATTCCT                   | <b>GC A GC</b> CCGGGGGATC -3'                                                     |
| 7              | *802/803                               | 5'-CCG <b>CCC</b> CTA           | <b>GC G GC</b> CGGGGAGGGA -3'                                                     |
| 8              | *829/830                               | 5'-G <b>CCG</b> GTCC            | <b>GC G GC</b> CGGCGAACGG -3'                                                     |
| 9<br>(1 to 83) | 872/873 to<br>1115/1116                | repeat                          | 5'-AG <b>CCG</b> GGAAT <b>GC T GC T GC T GC T GC T G.....C T GC</b> TGGGGGGATC-3' |
| 10             | 1199/1200                              | 5'-G <b>CC</b> TGGGAAG          | <b>GC A GC</b> AAG <b>CCG</b> GGCC-3'                                             |
| 11             | *1353/1354                             | 5'-TTGGG <b>CT</b> AGA          | <b>GC G GC</b> CG <b>CC</b> ACCGCG-3'                                             |
| 12             | *1356/1357                             | 5'-GG <b>CT</b> AGAG <b>CG</b>  | <b>GC C GC</b> CACCG <b>CG</b> GTG -3'                                            |
| 13             | 1593/1594                              | 5'-TGTCGTG <b>CCA</b>           | <b>GC T GC</b> ATTAATGAAT -3'                                                     |
| 14             | *1731/1732                             | 5'-AGAGG <b>CCG</b> GAG         | <b>GC G GC</b> CTCGG <b>CC</b> TCT -3'                                            |
| 15             | *1896/1897                             | 5'-TCACTGACTC                   | <b>GC T GC</b> G <b>CT</b> CGGTCGT -3'                                            |
| 16             | *1914/1915                             | 5'-CGGTCGTT <b>CG</b>           | <b>GC T GC</b> GG <b>CG</b> AG <b>CG</b> GT -3'                                   |
| 17             | *1917/1918                             | 5'-TCGTT <b>CGG</b> CT          | <b>GC G GC</b> GAG <b>CG</b> GTATC -3'                                            |
| 18             | *2035/2036                             | 5'-CCGTAAAAAG                   | <b>GC C GC</b> GTTG <b>CT</b> GGCG -3'                                            |
| 19             | *2190/2191                             | 5'-TTCCGAC <b>CC</b> T          | <b>GC C GC</b> TTACCGGATA -3'                                                     |
| 20             | *2333/2334                             | 5'-CAG <b>CCC</b> GACC          | <b>GC T GC</b> G <b>CC</b> TTATCCG -3'                                            |
| 21             | 2398/2399                              | 5'-ATCG <b>CC</b> ACTG          | <b>GC A GC</b> AG <b>CC</b> ACTGGT -3'                                            |
| 22             | 2401/2402                              | 5'-CCACTGG <b>CA</b>            | <b>GC A GC</b> CACTGGTAAC -3'                                                     |
| 23             | 2607/2608                              | 5'-TTGTTT <b>GCAA</b>           | <b>GC A GC</b> AGATTAC <b>CG</b> -3'                                              |
| 24             | 2935/2936                              | 5'-GG <b>CCC</b> AGT            | <b>GC T GC</b> AATGATACCG-3'                                                      |
| 25             | *3274/3275                             | 5'-AGTAAGTTG                    | <b>GC C GC</b> AGTGTTATCA-3'                                                      |
| 26             | 3301/3302                              | 5'-ATGGTTATG                    | <b>GC A GC</b> ACTG <b>C</b> ATAAT -3'                                            |
| 27             | *3396/3397                             | 5'-AATAGTGTAT                   | <b>GC G GC</b> GACCGAGTTG -3'                                                     |
| 28             | *3625/3626                             | 5'-AAGG <b>CA</b> AAAT          | <b>GC C GC</b> AAAAAAGGGA -3'                                                     |

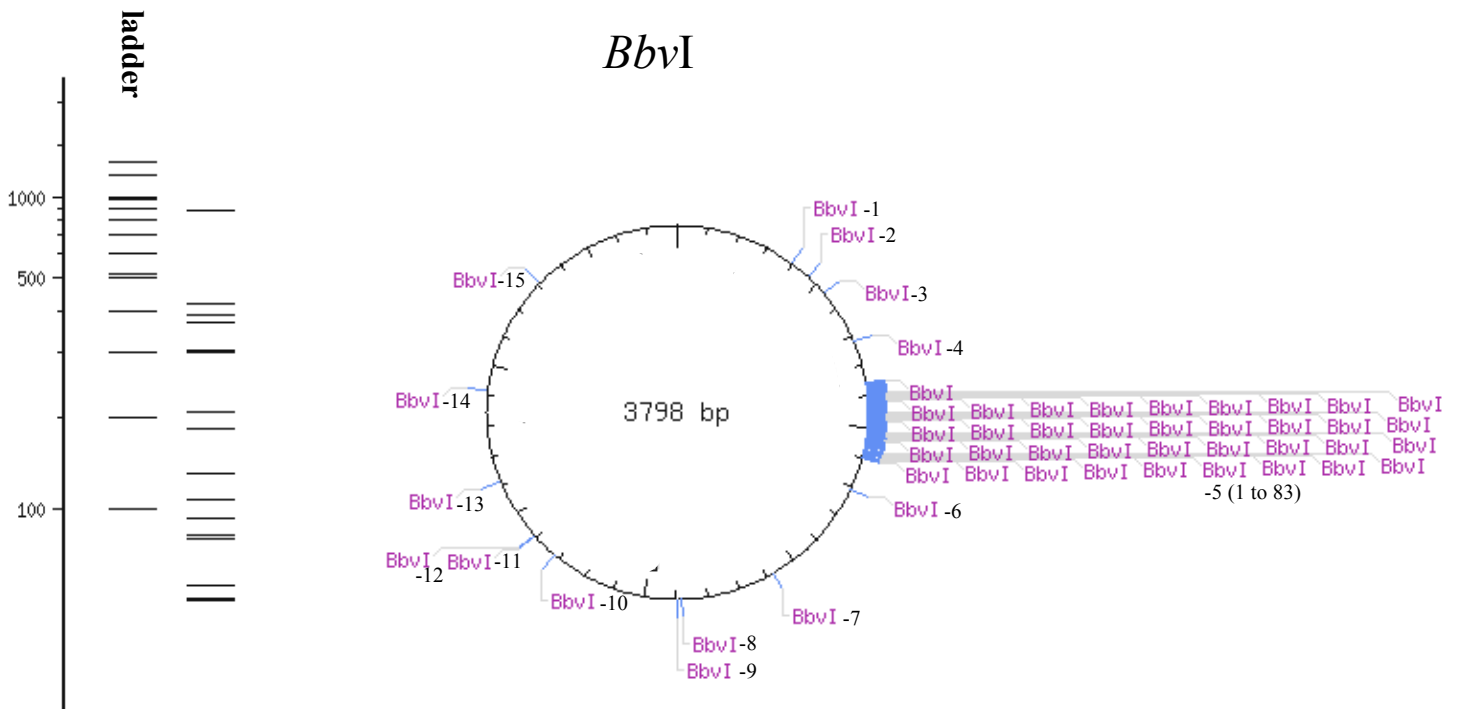

| #              | Cut position<br>(5' ext. -<br>3' ext.) | <b>BbvI site with flanks</b><br>5' -GCAGC NNNNNNNNN NNNN -3'<br>3' -CGT CG NNNNNNNNN NNNN -5'                                                     |
|----------------|----------------------------------------|---------------------------------------------------------------------------------------------------------------------------------------------------|
| 1              | 393/397                                | 5' -G TGTA <b>G</b> CGGTCAC <b>GCTGC</b> GCGTAACCAC -3'                                                                                           |
| 2              | 462/466                                | 5' -CA TTCG <b>C</b> CATTCAG <b>GCTGC</b> GCAACTGTTG -3'                                                                                          |
| 3              | 535/539                                | 5' -CG AAAG <b>A</b> GGGGATGT <b>GCTGC</b> AAGGCGATTA -3'                                                                                         |
| 4              | 721/725                                | 5' -TCGAATTCCT <b>G</b> CAGC CCGGGGGA TCTG <b>A</b> CT -3'                                                                                        |
| 5<br>(1 to 83) | 858/862 to<br>1101/1105                | repeat<br>5' -AGC CGG G <b>A</b> A T <b>A</b> <b>G</b> C T <b>A</b> G C ...TGGGGG -3' |
| 6              | 1210/1214                              | 5' - <b>G</b> CCTGGGAAG <b>G</b> CAGC AAG <b>C</b> CGGG <b>C</b> CGT <b>A</b> CC -3'                                                              |
| 7              | 1579/1583                              | 5' -AA CCTG <b>T</b> CGTG <b>C</b> CA <b>GCTGC</b> ATTAATGAAT -3'                                                                                 |
| 8              | 1882/1886                              | 5' -TC <b>G</b> CTC <b>A</b> CTGACTC <b>GCTGC</b> GCTCGGTCGT -3'                                                                                  |
| 9              | 1900/1904                              | 5' -GG <b>G</b> CCG <b>A</b> GTCGTTCG <b>GCTGC</b> GG <b>C</b> GAG <b>C</b> GGT -3'                                                               |
| 10             | 2319/2323                              | 5' -CG TTCA <b>A</b> GCCCGACC <b>GCTGC</b> GCCTTATCCG -3'                                                                                         |
| 11             | 2409/2413                              | 5' -ATCG <b>C</b> CACTG <b>G</b> CAGC AG <b>C</b> CACTG GTAA <b>A</b> CA -3'                                                                      |
| 12             | 2412/2416                              | 5' - <b>G</b> CCACTGG <b>C</b> A <b>G</b> CAGC CACTGGTA ACAG <b>A</b> GA -3'                                                                      |
| 13             | 2618/2622                              | 5' -TTGTTT <b>G</b> CAA <b>G</b> CAGC AGATTACG <b>C</b> GCA <b>A</b> GA -3'                                                                       |
| 14             | 2921/2925                              | 5' -CA TCTG <b>A</b> GCCCCAGT <b>GCTGC</b> AATGATACCG -3'                                                                                         |
| 15             | 3312/3316                              | 5' -CATGGTTATG <b>G</b> CAGC ACTG <b>C</b> ATA ATTC <b>A</b> TC -3'                                                                               |

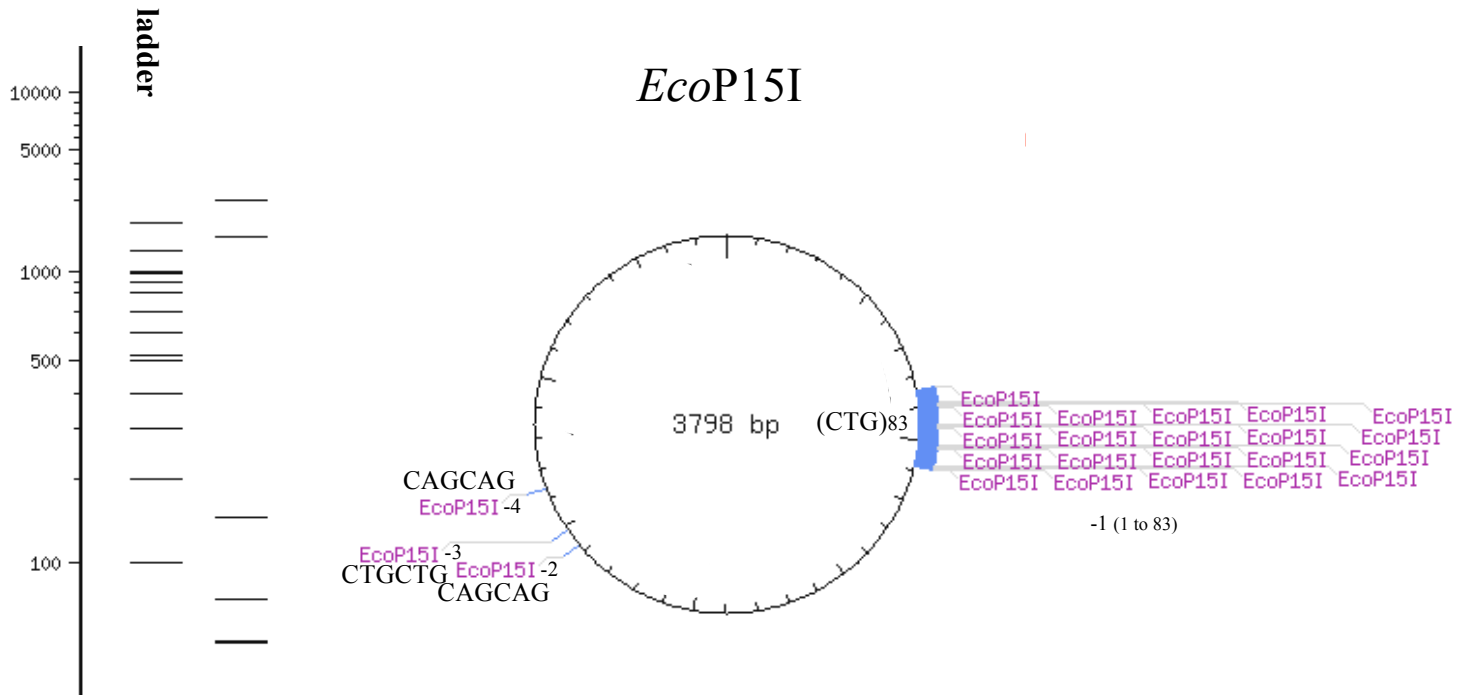

| #              | Cut position<br>(5' ext. -<br>3' ext.) | EcoP15I site with flanks                                                                                                                                      |                          |
|----------------|----------------------------------------|---------------------------------------------------------------------------------------------------------------------------------------------------------------|--------------------------|
|                |                                        | 5' -CAGCAG (N) 25 NN -3'                                                                                                                                      | 3' -GTCGTC (N) 25 NN -5' |
| 1<br>(1 to 83) | 844/846 to<br>1087/1089                | repeat<br>5' -GG CTAC GA <sup>▲</sup> A GG <sup>▲</sup> G TC <sup>▲</sup> C TT <sup>▲</sup> G TA <sup>▲</sup> G CCG GGA ATG CTG CTG CTG CTG CTGC.....CTGGG-3' |                          |
| 2              | 2428/2430                              | 5' -TCGCCACTGG CAGCAG CCACTGGTAAACAGGATTAGCAGAG CG <sup>▲</sup> AG-3'                                                                                         |                          |
| 3              | 2486/2488                              | 5' -CT <sup>▼</sup> AG <sup>▲</sup> AAGGACAGTATTTGGTATCTGCGCT CTGCTG AAGCCAGTTA-3'                                                                            |                          |
| 4              | 2637/2639                              | 5' -TGTTTCAAG CAGCAG ATTACGCGCAGAAAAAAGGATCTC AA <sup>▲</sup> GA-3'                                                                                           |                          |

# MwoI

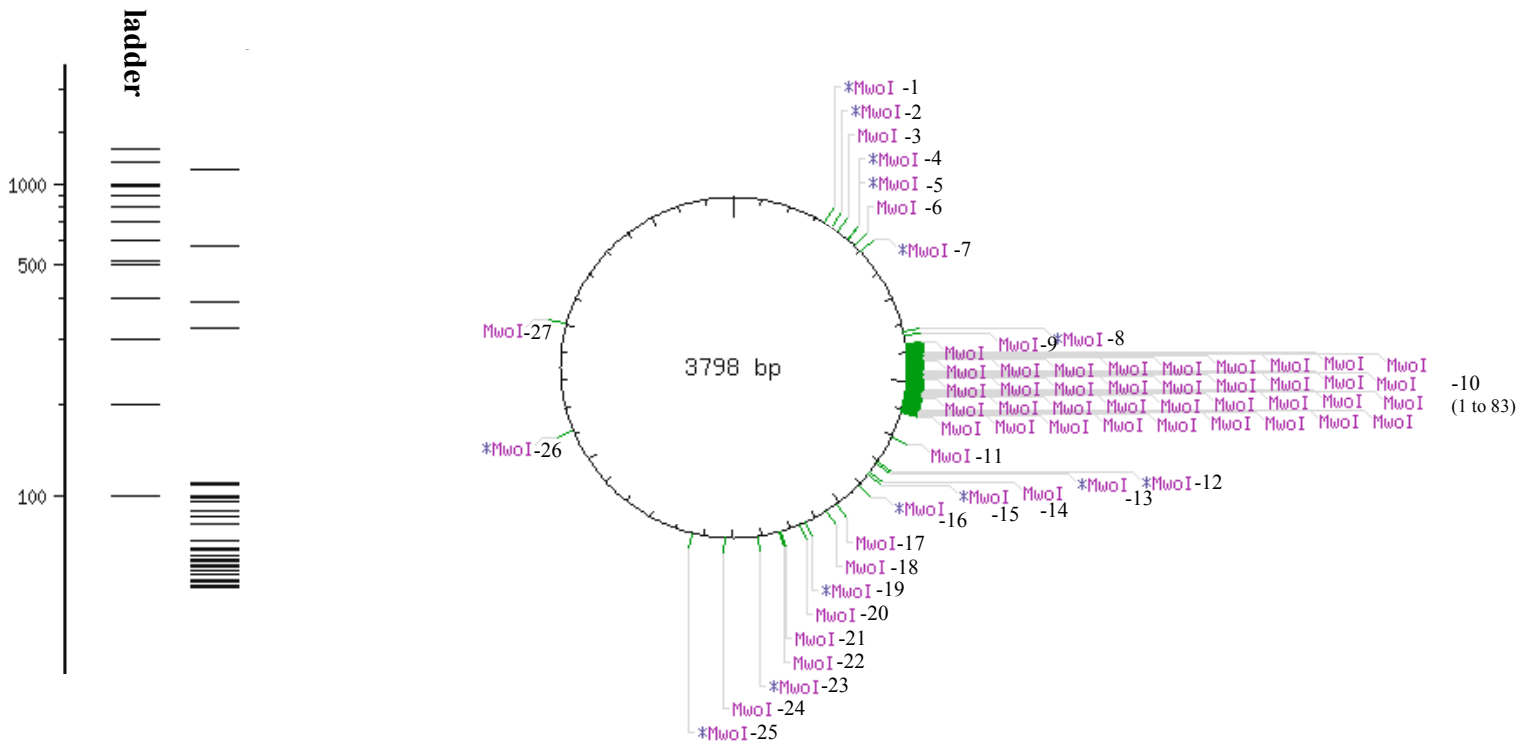

| #               | Cut position<br>(5' ext. -<br>3' ext.) | <i>MwoI</i> site with flanks |                                                                                                                                     |
|-----------------|----------------------------------------|------------------------------|-------------------------------------------------------------------------------------------------------------------------------------|
|                 |                                        | 5' -GCNN NNN NNGC-3'         | 3' -CGNN NNN NNCG-5'                                                                                                                |
| 1               | *338/335                               | 5'-GGGAAAGCCG                | GCGA <sub>▲</sub> ACG TGGC GAGAAAGGAA-3'                                                                                            |
| 2               | *368/365                               | 5'-AGGGAAGAAA                | GCGA <sub>▲</sub> AAG GAGC GGGCGCTAGG-3'                                                                                            |
| 3               | 395/392                                | 5'-AGGGCGCTG                 | GCAA <sub>▲</sub> GTG TAGC GGTCACGCTG-3'                                                                                            |
| 4               | *437/434                               | 5'-ACACCCGCC                 | GCGC <sub>▲</sub> TTA ATGC GCCGCTACAG-3'                                                                                            |
| 5               | *439/436                               | 5'-ACCCGCCGC                 | GCTT <sub>▲</sub> AAT GCGC CGCTACAGGG-3'                                                                                            |
| 6               | 472/469                                | 5'-CGTCCCATT                 | GCCA <sub>▲</sub> TTC AGGC TGCGCAACTG-3'                                                                                            |
| 7               | *502/499                               | 5'-GTTGGGAAGG                | GCGA <sub>▲</sub> TCG GTGC GGGCCTCTTC-3'                                                                                            |
| 8               | *825/822                               | 5'-GGAGGGAGGG                | GCCG <sub>▲</sub> GGT CCGC GGCCGGCGAA-3'                                                                                            |
| 9               | 841/838                                | 5'-TCCGCGGCCG                | GCGA <sub>▲</sub> ACG GGGC TCGAAGGGTC-3'                                                                                            |
| 10<br>(1 to 83) | 868/865 to<br>1114/1111                | repeat                       | 5'-GGTCCTTGTA GCCG <sub>▲</sub> GGA <sub>▲</sub> ATG <sub>▲</sub> CTG <sub>▲</sub> CTG <sub>▲</sub> CTG <sub>▲</sub> .....CTG...-3' |
| 11              | 1207/1204                              | 5'-TGGGAAGGCA                | GCAA <sub>▲</sub> GCC GGGC CGTCCGTGTT-3'                                                                                            |
| 12              | *1306/1303                             | 5'-GCTCTGGGGA                | GCGT <sub>▲</sub> CTG GCGC GATCTCTGCC-3'                                                                                            |
| 13              | *1315/1312                             | 5'-AGCGTCTGGC                | GCGA <sub>▲</sub> TCT CTGC CTGCTTACTC-3'                                                                                            |
| 14              | 1352/1349                              | 5'-TTTGCTTTGG                | GCTA <sub>▲</sub> GAG CGGC CGCCACCGCG-3'                                                                                            |
| 15              | *1361/1358                             | 5'-GGCTAGAGCG                | GCCG <sub>▲</sub> CCA CCGC GGTGGAGCTC-3'                                                                                            |
| 16              | *1413/1410                             | 5'-GGGTTAATT                 | GCGC <sub>▲</sub> GCT TGGC GTAATCATGG-3'                                                                                            |
| 17              | 1512/1509                              | 5'-AAGTGTAAT                 | GCCT <sub>▲</sub> GGG GTGC CTAATGAGTG-3'                                                                                            |
| 18              | 1556/1553                              | 5'-TAATTGCGTT                | GCGC <sub>▲</sub> TCA CTGC CCGCTTTCCA-3'                                                                                            |
| 19              | *1640/1637                             | 5'-GAGGCGGTTT                | GCGT <sub>▲</sub> ATT GGGC GCTCTTCCGC-3'                                                                                            |
| 20              | 1659/1656                              | 5'-GCGCTCTTCC                | GCTC <sub>▲</sub> TAG AAGC TTTTTCAAA-3'                                                                                             |
| 21              | 1730/1727                              | 5'-TAGCTCAGAG                | GCCG <sub>▲</sub> AGG CGGC CTCGGCCTCT-3'                                                                                            |
| 22              | 1736/1733                              | 5'-AGAGGCCGAG                | GCGG <sub>▲</sub> CCT CGGC CTCTGCATAA-3'                                                                                            |
| 23              | *1815/1812                             | 5'-GGAGTTAGGG                | GCGG <sub>▲</sub> GAT GGGC GGAGTTAGGG-3'                                                                                            |
| 24              | 1929/1926                              | 5'-GCTGCGGCGA                | GCGG <sub>▲</sub> TAT CAGC TCACTCAAAG-3'                                                                                            |
| 25              | *2043/2040                             | 5'-TAAAAAGGCC                | GCGT <sub>▲</sub> TGC TGGC GTTTTTCCAT-3'                                                                                            |
| 26              | *2615/2612                             | 5'-TTTGCAAGCA                | GCAG <sub>▲</sub> ATT ACGC GCAGAAAAAA-3'                                                                                            |
| 27              | 3003/3000                              | 5'-AAACCAGCCA                | GCCG <sub>▲</sub> GAA GGGC CGAGCGCAGA-3'                                                                                            |

# TseI

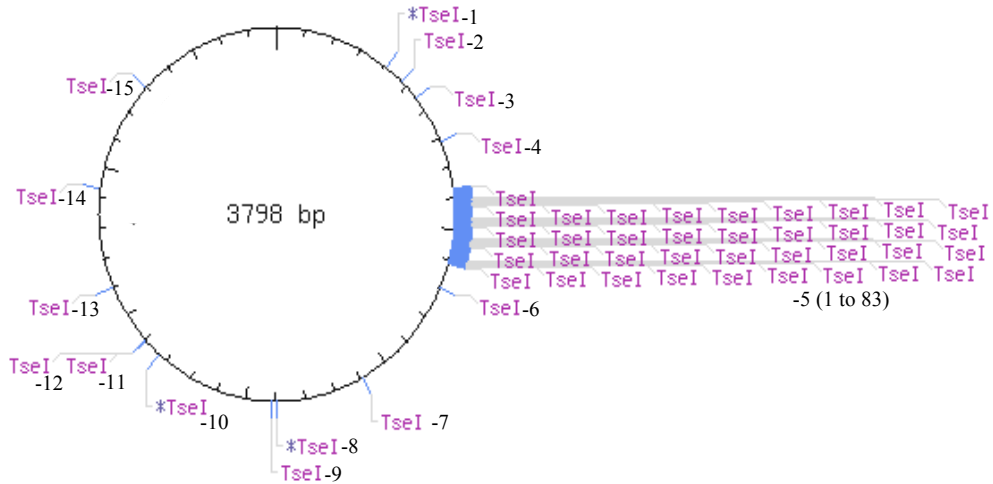

| #              | Cut position<br>(5' ext. -<br>3' ext.) | <i>TseI</i> site with flanks |                                           |
|----------------|----------------------------------------|------------------------------|-------------------------------------------|
|                |                                        | 5' -G CWG C-3'               | 3' -C GWC G-5'                            |
| 1              | *406/409                               | 5' -TAGCGGTCAC               | G CTG C GCGTAACCAC-3'                     |
| 2              | 475/478                                | 5' -CGCCATTCAG               | G CTG C GCAACTGTTG-3'                     |
| 3              | 548/551                                | 5' -AGGGGGATGT               | G CTG C AAGGCGATTA-3'                     |
| 4              | 709/712                                | 5' -TCGAATTCCT               | G CAG C CCGGGGGATC-3'                     |
| 5<br>(1 to 83) | 871/874 to<br>1114/1117                | repeat<br>5' -AGCCGGGAAT     | G CTG CG CTG CG CTG ..... CTG CTGGGGGG-3' |
| 6              | 1198/1201                              | 5' -GCCTGGGAAG               | G CAG C AAGCCGGGCC-3'                     |
| 7              | 1592/1595                              | 5' -TGTCGTGCCA               | G CTG C ATTAATGAAT-3'                     |
| 8              | *1895/1898                             | 5' -TCACTGACTC               | G CTG C GCTCGGTCGT-3'                     |
| 9              | 1913/1916                              | 5' -CGGTCGTTCG               | G CTG C GGCGAGCGGT-3'                     |
| 10             | *2332/2335                             | 5' -CAGCCCGACC               | G CTG C GCCTTATCCG-3'                     |
| 11             | 2397/2400                              | 5' -ATCGCCACTG               | G CAG C AGCCACTGGT-3'                     |
| 12             | 2400/2403                              | 5' -GCCACTGGCA               | G CAG C CACTGGTAAC-3'                     |
| 13             | 2606/2609                              | 5' -TTGTTTGCAA               | G CAG C AGATTACCG-3'                      |
| 14             | 2934/2937                              | 5' -TGGCCCCAGT               | G CTG C AATGATACCG-3'                     |
| 15             | 3300/3303                              | 5' -CATGGTTATG               | G CAG C ACTGCATAAT-3'                     |

# ApeKI

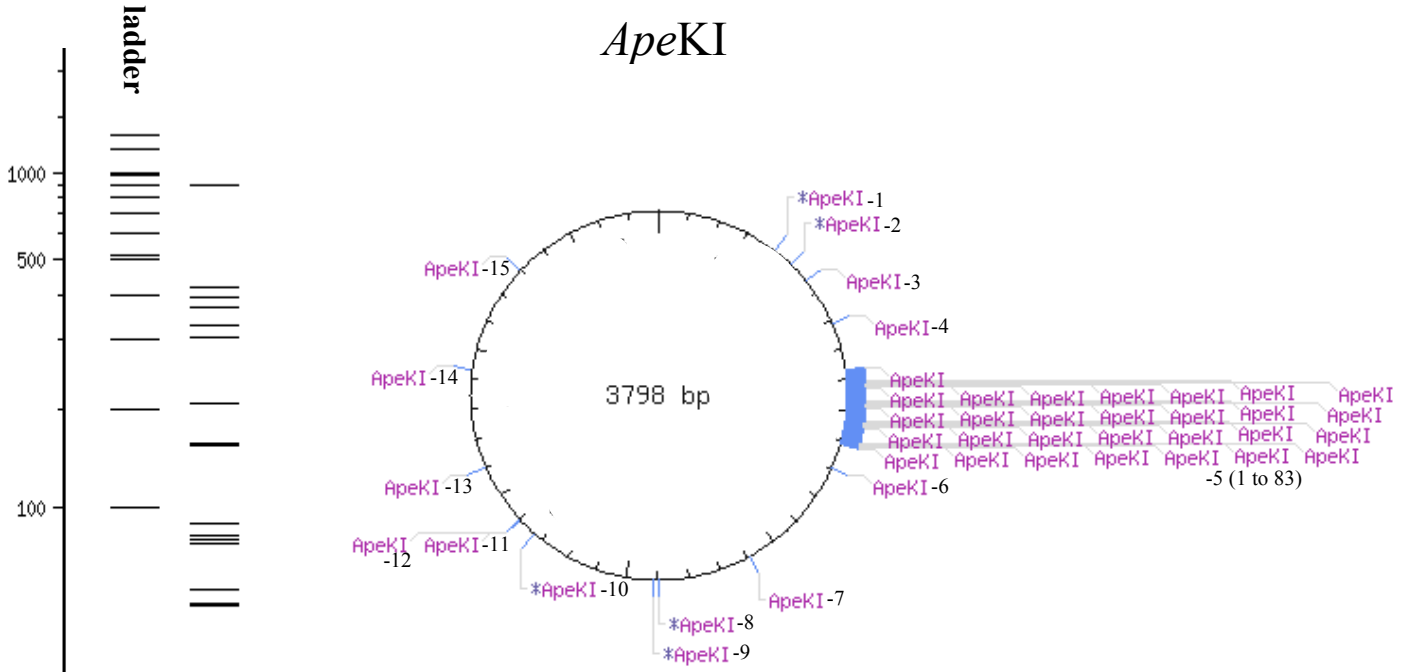

| #              | Cut position<br>(5' ext. -<br>3' ext.) | <i>ApeKI</i> site with flanks |                                  |
|----------------|----------------------------------------|-------------------------------|----------------------------------|
|                |                                        | 5' -G CWG C-3'                | 3' -C GWC G-5'                   |
| 1              | *406/409                               | 5' -TAGCGGTCAC                | G CTG C GCGTAACCAC-3'            |
| 2              | *475/478                               | 5' -CGCCATTCAG                | G CTG C GCAACTGTTG-3'            |
| 3              | 548/551                                | 5' -AGGGGGATGT                | G CTG C AAGGCGATTA-3'            |
| 4              | 709/712                                | 5' -TCGAATTCCT                | G CAG C CCGGGGGATC-3'            |
| 5<br>(1 to 83) | 871/874 to<br>1114/1117                | repeat<br>5' -AGCCGGAAT       | G CTG CTG CTG ..... CTG CTGGG-3' |
| 6              | 1198/1201                              | 5' -GCCTGGGAAG                | G CAG C AAGCCGGGCC-3'            |
| 7              | 1592/1595                              | 5' -TGTCGTCCA                 | G CTG C ATTAATGAAT-3'            |
| 8              | *1895/1898                             | 5' -TCACTGACTC                | G CTG C GCTCGGTCGT-3'            |
| 9              | *1913/1916                             | 5' -CGGTCGTTTCG               | G CTG C GGCGAGCGGT-3'            |
| 10             | *2332/2335                             | 5' -CAGCCCGACC                | G CTG C GCCTTATCCG-3'            |
| 11             | 2397/2400                              | 5' -ATCGCCACTG                | G CAG C AGCCACTGGT-3'            |
| 12             | 2400/2403                              | 5' -GCCACTGGCA                | G CAG C CACTGGTAAC-3'            |
| 13             | 2606/2609                              | 5' -TTGTTTGCAA                | G CAG C AGATTACCG-3'             |
| 14             | 2934/2937                              | 5' -TGGCCCCAGT                | G CTG C AATGATACCG-3'            |
| 15             | 3300/3303                              | 5' -CATGGTTATG                | G CAG C ACTGCATAAT-3'            |
